# Supplementary material for: Ligand-partially-protected metal-chalcogenide supertetrahedral clusters
Source: Royal Society of Chemistry journal article supplement (doi:10.1039/d2dt02481k), 2022-01-01
Supplement: d2dt02481k1.pdf [file d2dt02481k1.pdf]

*Supporting Information For*

**Ligand-partially-protected metal-chalcogenide  
supertetrahedral clusters**

*Jin Wu,<sup>a</sup> Peipei Sun,<sup>a</sup> Xiang Wang,<sup>c,\*</sup> Ning Chen,<sup>a</sup> and Tao Wu<sup>a,b,\*</sup>*

*<sup>a</sup>College of Chemistry, Chemical Engineering and Material Sciences, Soochow University, Suzhou, 215123.*

*<sup>b</sup>College of Chemistry and Materials Science, Guangdong Provincial Key Laboratory of Functional Supramolecular Coordination Materials and Applications, Jinan University, Guangzhou, 510632.*

*<sup>c</sup>School of New Energy Materials and Chemistry, Leshan Normal University, Leshan, Sichuan, 614004.*

## Supplementary Tables and Figures

**Table S1.** The structure refinement parameters on **ISC-24**, **ISC-25** and **ISC-26** series.

| Compound                                                                    | ISC-24-MnSnS                                                                                    | ISC-25-MnSnS-SPh                                                                                | ISC-26-MnSnSeS-SPh                                                                                              | ISC-26-MnSnSeCl-SePh                                                                                                   |
|-----------------------------------------------------------------------------|-------------------------------------------------------------------------------------------------|-------------------------------------------------------------------------------------------------|-----------------------------------------------------------------------------------------------------------------|------------------------------------------------------------------------------------------------------------------------|
| E. F.                                                                       | C <sub>63</sub> H <sub>141</sub> Mn <sub>4</sub> N <sub>9</sub> S <sub>17</sub> Sn <sub>4</sub> | C <sub>60</sub> H <sub>111</sub> Mn <sub>4</sub> N <sub>6</sub> S <sub>17</sub> Sn <sub>4</sub> | C <sub>66</sub> H <sub>116</sub> Mn <sub>4</sub> N <sub>6</sub> S <sub>5</sub> Se <sub>12</sub> Sn <sub>4</sub> | C <sub>66</sub> H <sub>126</sub> Mn <sub>4</sub> N <sub>6</sub> Se <sub>16.57</sub> Cl <sub>0.43</sub> Sn <sub>4</sub> |
| F. W.                                                                       | 2303.653                                                                                        | 2192.33                                                                                         | 2795.98                                                                                                         | 3022.79                                                                                                                |
| Morphology                                                                  | block                                                                                           | rhombohedral                                                                                    | rhombohedral                                                                                                    | rhombohedral                                                                                                           |
| Crystal system                                                              | Cubic                                                                                           | trigonal                                                                                        | trigonal                                                                                                        | trigonal                                                                                                               |
| Space group                                                                 | <i>P</i> -43 <i>n</i>                                                                           | <i>R</i> -3                                                                                     | <i>R</i> -3                                                                                                     | <i>R</i> -3                                                                                                            |
| <i>Z</i>                                                                    | 6                                                                                               | 6                                                                                               | 6                                                                                                               | 6                                                                                                                      |
| <i>T</i> / <i>K</i>                                                         | 120.00                                                                                          | 120.00                                                                                          | 123.00                                                                                                          | 120.03                                                                                                                 |
| $\lambda/\text{\AA}$                                                        | 0.71073                                                                                         | 0.71073                                                                                         | 0.71073                                                                                                         | 0.71073                                                                                                                |
| <i>a</i> / $\text{\AA}$                                                     | 27.9971(13)                                                                                     | 16.1766(5)                                                                                      | 16.4718(5)                                                                                                      | 16.5878(5)                                                                                                             |
| <i>b</i> / $\text{\AA}$                                                     | 27.9971(13)                                                                                     | 16.1766(5)                                                                                      | 16.4718(5)                                                                                                      | 16.5878(5)                                                                                                             |
| <i>c</i> / $\text{\AA}$                                                     | 27.9971(13)                                                                                     | 62.4767(18)                                                                                     | 62.634(2)                                                                                                       | 62.041(2)                                                                                                              |
| $\alpha^\circ$                                                              | 90                                                                                              | 90                                                                                              | 90                                                                                                              | 90                                                                                                                     |
| $\beta^\circ$                                                               | 90                                                                                              | 90                                                                                              | 90                                                                                                              | 90                                                                                                                     |
| $\gamma^\circ$                                                              | 90                                                                                              | 120                                                                                             | 120                                                                                                             | 120                                                                                                                    |
| <i>V</i> / $\text{\AA}^3$                                                   | 21945(3)                                                                                        | 14158.7(10)                                                                                     | 14717.2(10)                                                                                                     | 14783.7(10)                                                                                                            |
| <i>D</i> (g/cm <sup>3</sup> )                                               | 1.396                                                                                           | 1.547                                                                                           | 1.893                                                                                                           | 2.037                                                                                                                  |
| $\mu/\text{mm}^{-1}$                                                        | 2.111                                                                                           | 2.449                                                                                           | 6.093                                                                                                           | 7.662                                                                                                                  |
| <i>F</i> (000)                                                              | 9392.0                                                                                          | 6630.0                                                                                          | 8052.0                                                                                                          | 8610.0                                                                                                                 |
| Col. refs.                                                                  | 469759                                                                                          | 20190                                                                                           | 22357                                                                                                           | 127820                                                                                                                 |
| Indep. refs.                                                                | 3822                                                                                            | 4464                                                                                            | 5937                                                                                                            | 6022                                                                                                                   |
| GOF on <i>F</i> <sup>2</sup>                                                | 1.103                                                                                           | 1.038                                                                                           | 1.046                                                                                                           | 1.049                                                                                                                  |
| <i>R</i> <sub>1</sub> , <i>wR</i> <sub>2</sub> ( <i>I</i> > 2σ( <i>I</i> )) | 0.0349, 0.0790                                                                                  | 0.0446, 0.1157                                                                                  | 0.0543, 0.1279                                                                                                  | 0.0502, 0.1172                                                                                                         |
| <i>R</i> <sub>1</sub> , <i>wR</i> <sub>2</sub> (all data)                   | 0.0462, 0.0939                                                                                  | 0.0531, 0.1255                                                                                  | 0.0953, 0.1566                                                                                                  | 0.0655, 0.1327                                                                                                         |

Abbreviations: E. F.: Empirical formula; F. W.: Formula Weight.

**Table S2.** Summary of the existing PP-type metal chalcogenide supertetrahedral cluster. The cases using the same capping reagent but different in sizes or components were omitted for clarity.

| Compound name        | Cluster formula                                                                                                                | Type | Terminating reagent       | Ref.             |
|----------------------|--------------------------------------------------------------------------------------------------------------------------------|------|---------------------------|------------------|
| ISC-1                | $[\text{Ga}_{10}\text{S}_{16}(\text{SH})(3,5\text{-DMP})_3]^{3-}$                                                              | A    | 3,5-dimethylpyridine      | 1                |
| ISC-2                | $[\text{Ga}_{10}\text{S}_{16}(\text{SH})(3,4\text{-DMP})_3]^{3-}$                                                              | A    | 3,4-dimethylpyridine      | 1                |
| ISC-3                | $[\text{In}_{10}\text{S}_{16}(\text{DBN})_4]^{2-}$                                                                             | A    | DBN                       | 1                |
| ISC-9                | $[\text{In}_{22}\text{Cd}_{13}\text{S}_{52}(1\text{-MIM})_4]^{12-}$                                                            | A    | 1-methylimidazole         | 1                |
| T5-1                 | $(\text{C}_9\text{H}_{17}\text{N}_2)_{12}[\text{Cu}_5\text{In}_{30}\text{Se}_{52}\text{Cl}_3(\text{C}_3\text{H}_4\text{N}_2)]$ | A    | imidazole                 | 2                |
| IL-InSe-3            | $\text{C}_{53}\text{H}_{99}\text{N}_{12}\text{Cl}_3\text{In}_{10}\text{Se}_{16}$                                               | A    | 1-butyl-2-methylimidazole | 3                |
| 1c                   | $[\text{Bmmim}]_4[\text{Sn}_{10}\text{S}_{16}\text{O}_4(\text{SMe})_4]$                                                        | B    | Methyl                    | 4                |
| 1a                   | $[\text{Bmmim}]_7[\text{Sn}_{10}\text{S}_{16}\text{O}_4(\text{SBu})_4]\text{Br}_3$                                             | B    | Butyl                     | 5                |
| ISC-25-MnSnS-SPh     | $[\text{Mn}_4\text{Sn}_4\text{S}_{14}(\text{SPh})_3]^{7-}$                                                                     | C    | Phenyl                    | <b>This work</b> |
| ISC-26-MnSnSeCl-SePh | $[\text{Mn}_4\text{Sn}_4\text{Se}_{12.6}\text{Cl}_{0.4}(\text{SePh})_4]^{5.6-}$                                                | C    | Phenyl                    | <b>This work</b> |
| ISC-26-MnSnSeS-SPh   | $[\text{Mn}_4\text{Sn}_4\text{Se}_{12}\text{S}(\text{SPh})_4]^{6-}$                                                            | C    | Phenyl                    | <b>This work</b> |

Notes: Type A: Nitrogen containing species terminated; Type B, Alkyl group covalently terminated, Type C, Aryl group covalently terminated.

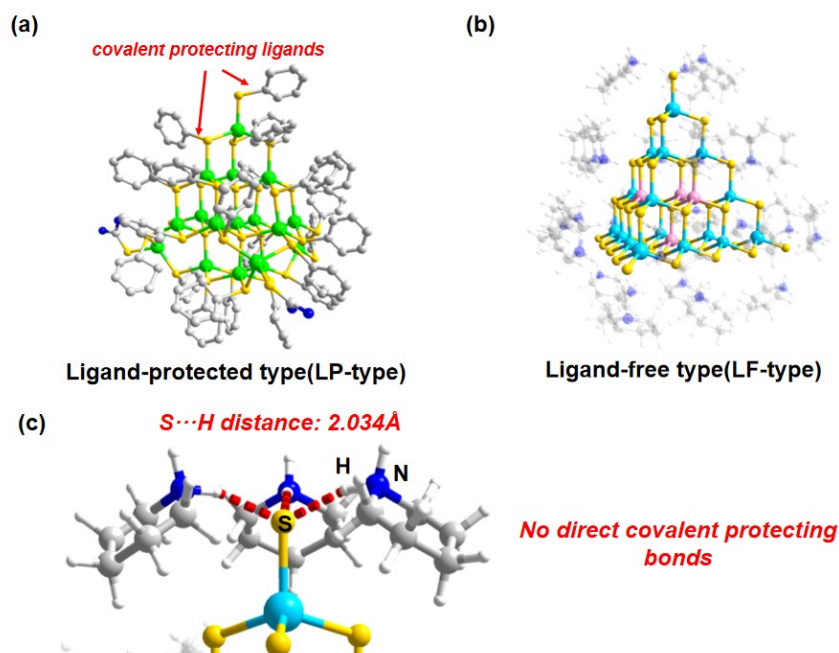

**Fig. S1.** Typical models of  $C_n$  series clusters (or called: ligand-protected type, LP-type) and  $T_n$  series clusters (or called: ligand-free type, LF-type). (a) LP-type MCSCs, the excess negative charge generated by  $S^{2-}$  were neutralized by covalent linked ligands; (b) LF-type MCSCs, the excess negative charge generated by  $S^{2-}$  were neutralized by the protonated organic amines (usually called templates in the synthetic process), the counterions were blurred to highlight the cluster; (c) The hydrogen bonds that further stable the isolated clusters. Green, Cd atom; pink, Zn atom; yellow, S atom, respectively.

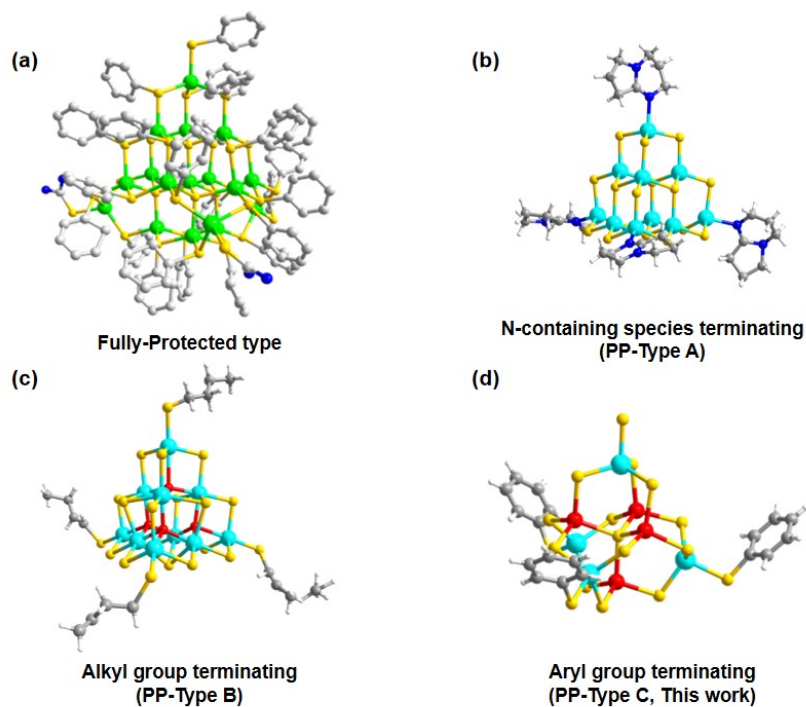

**Fig. S2.** Summary of the existing types of ligand protected metal chalcogenide supertetrahedral clusters..

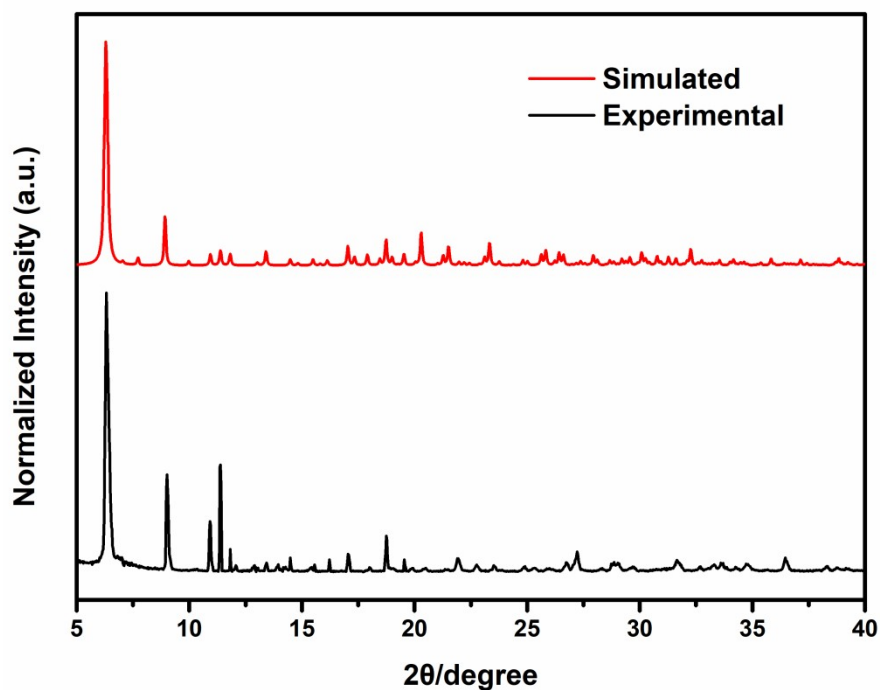

**Fig. S3.** Powder X-ray diffraction (PXRD) pattern of as-synthesized **ISC-24-MnSnS** and its simulated results.

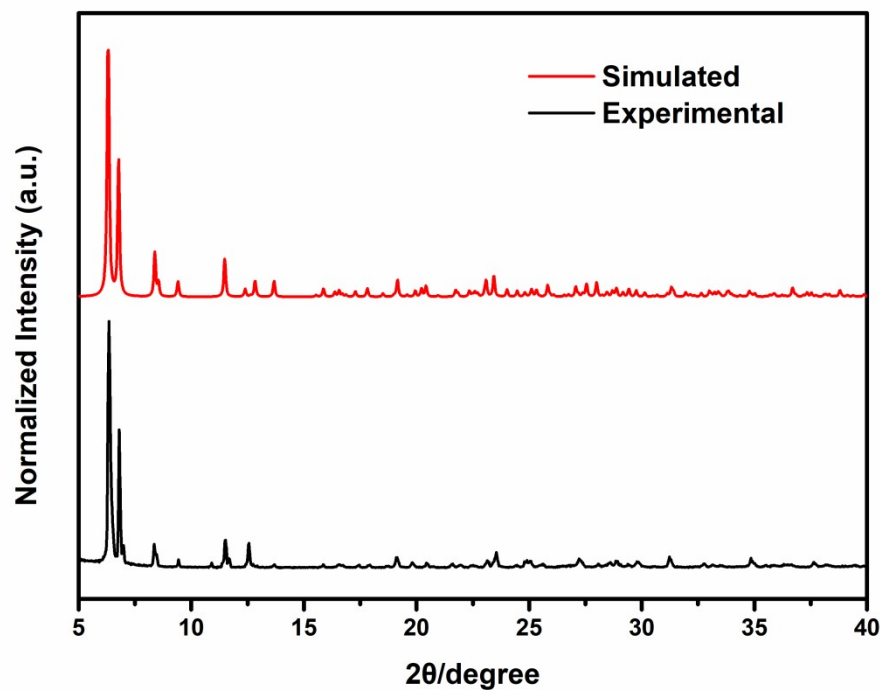

**Fig. S4.** Powder X-ray diffraction (PXRD) pattern of as-synthesized **ISC-25-MnSnS-SPh** and its simulated results.

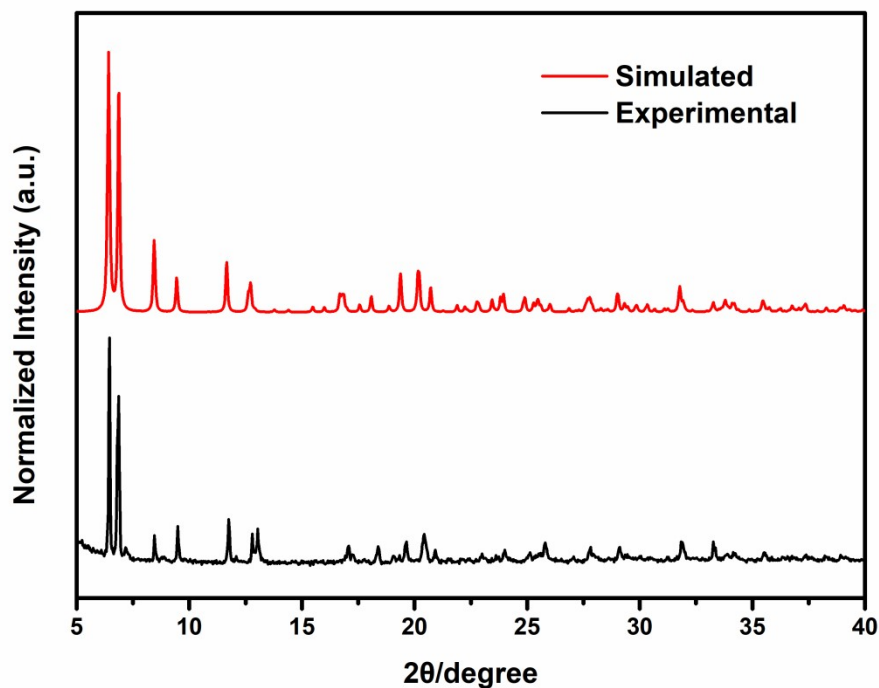

**Fig. S5.** Powder X-ray diffraction (PXRD) pattern of as-synthesized **ISC-26-MnSnSeCl-SePh** and its simulated results.

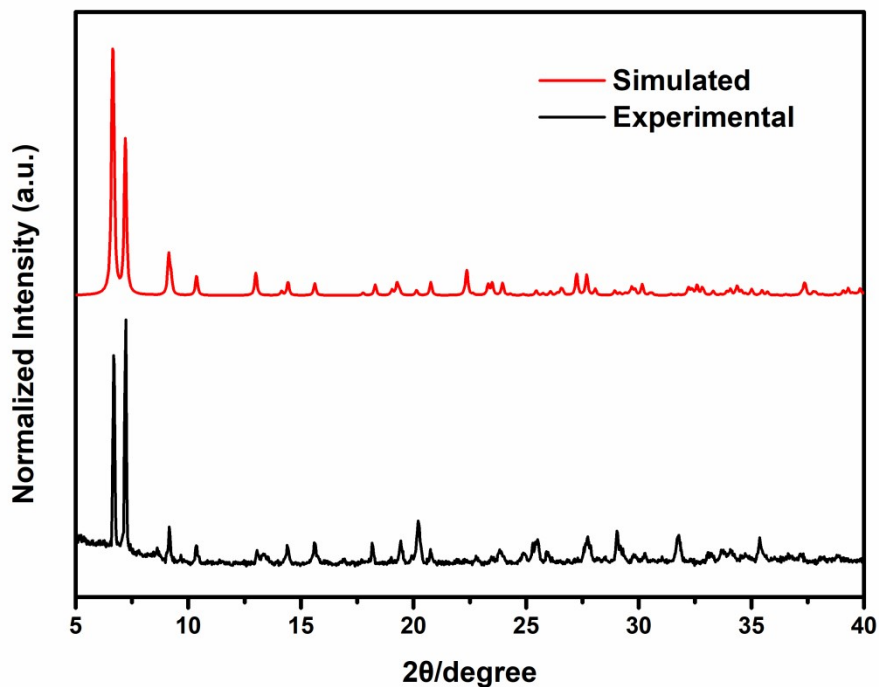

**Fig. S6.** Powder X-ray diffraction (PXRD) pattern of as-synthesized **ISC-26-MnSnSeS-SPh** and its simulated results.

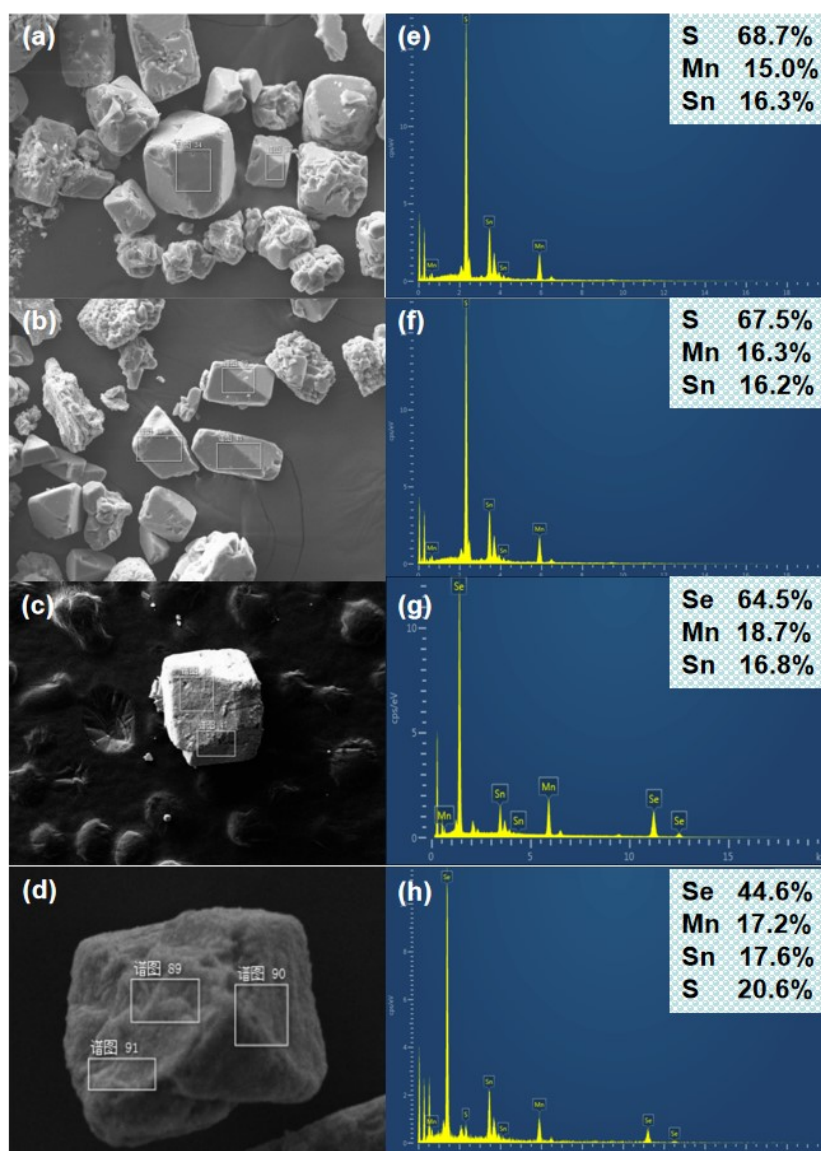

**Fig. S7.** SEM image (left) and EDS result (right) of **ISC-24-MnSnS** (a & e); **ISC-25-MnSnS-SPh** (b & f); **ISC-26-MnSnSeCl-SePh** (c & g) and **ISC-26-MnSnSeS-SPh** (d & h). According to the molecular formula of the title compounds, the ratio of Mn: Sn: Q (Q represents S or Se) in the **ISC-24**, **ISC-25** and **ISC-26** series structures should be 4:4:17, and the converted atomic percentage should be Mn (16%), Sn (16%), Q (68%), respectively. But the weak signal of Cl in **ISC-26-MnSnSnSeCl-SePh** has been judged as impurity by the instrument, so the test result here should be Mn: Sn: Se=4:4:16, that is, the atomic percentage should be Mn (16%), Sn (16%), Q (68%), respectively. The Cl existence has been further verified by XPS test. All in all, the test results are in good agreement with the fitting results.

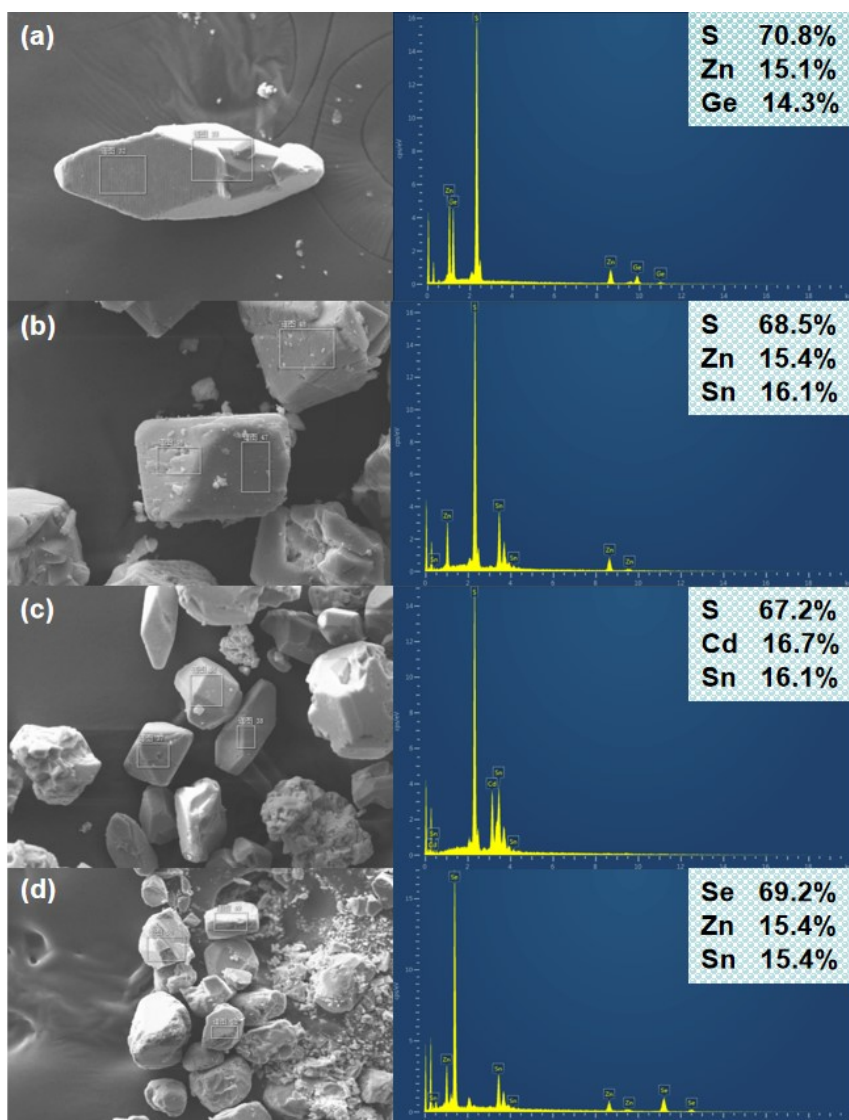

**Fig. S8.** SEM image (left) and EDS results (right) of **ISC-25** or **ISC-26** series with different components. According to the molecule formula of the title compounds, the ratio of Mn: Sn: Q (Q represents S or Se) in the **ISC-25** or **ISC-26** series structures should be 4:4:17, and the converted atomic percentage should be Mn (16%), Sn (16%), Q (68%), respectively. The above test results are in good agreement with the fitting results.



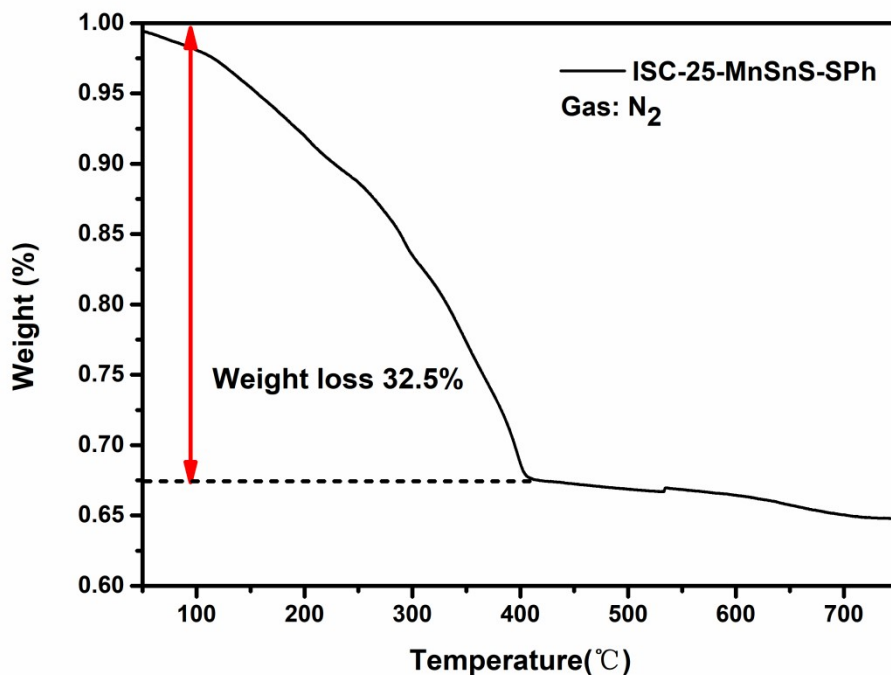

**Fig. S9.** TGA curves of ISC-25-MnSnS-SPh. ISC-25-MnSnS-SPh undergoes the total step weight loss about 32.5% from room temperature to 400°C, which is in good agreement with the calculated value from the SCXRD analysis, corresponding to the loss of the organic components (Calcd. 33.62%).

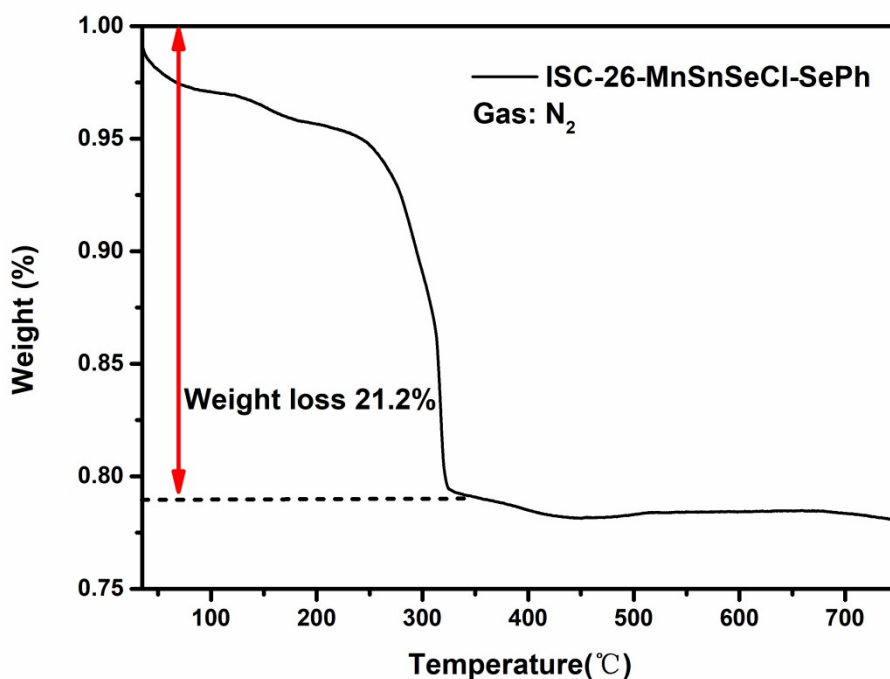

**Fig. S10.** TGA curves of ISC-26-MnSnSeCl-SePh. ISC-26-MnSnSeCl-SePh undergoes the total step weight loss about 21.2% from room temperature to 350°C, which is in good agreement with the calculated value from the SCXRD analysis, corresponding to the loss of the organic components (Calcd. 22.51%).

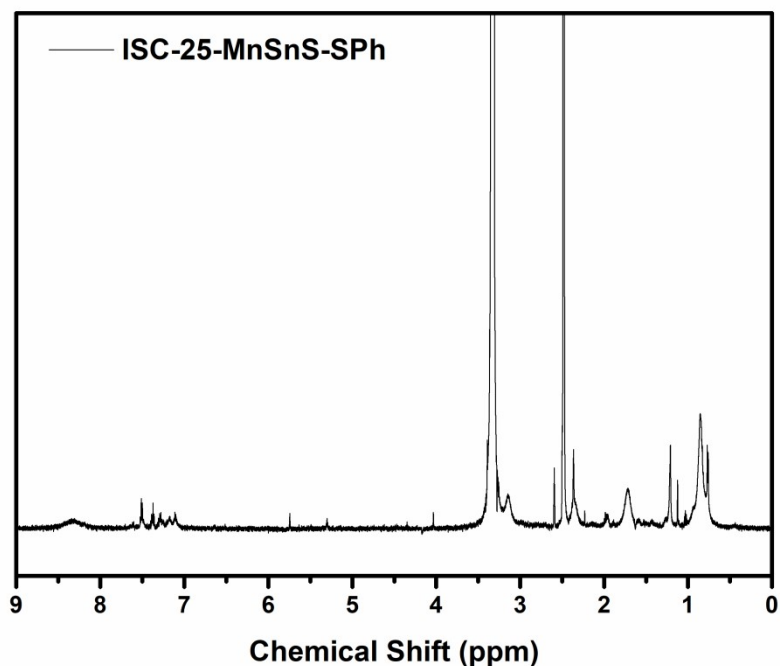

**Fig. S11.**  $^1\text{H}$ -NMR spectrum for **ISC-25-MnSnS-SPh**. The two strong signal at 2.5 ppm and 3.3 ppm are inferred to  $d^6$ -DMSO and  $\text{H}_2\text{O}$ , respectively. The signals at chemical shift between 7-8 ppm confirmed the existence of benzene species, while the signals at 8-9 ppm can be determined as  $\text{N-H}\cdots\text{S}$  hydrogen bonds between the protonated 3,5-DMP and the cluster.

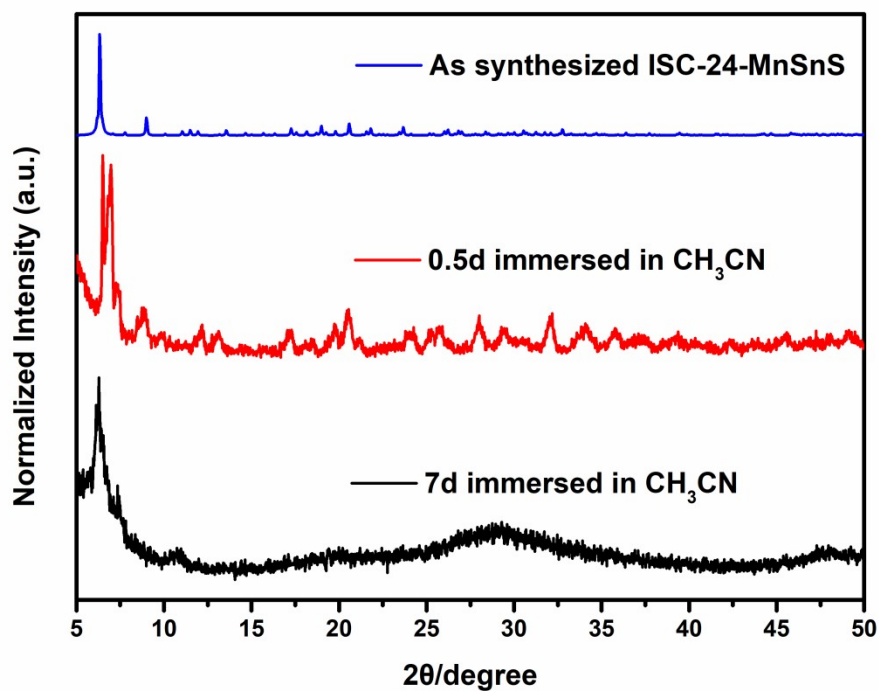

**Fig. S12.** Chemical stability test of **ISC-24-MnSnS**. The crystals were immersed acetonitrile ( $\text{MeCN}$ ) for 0.5 or 7 days, and then the solvent was removed and the crystals were dried for further testing.

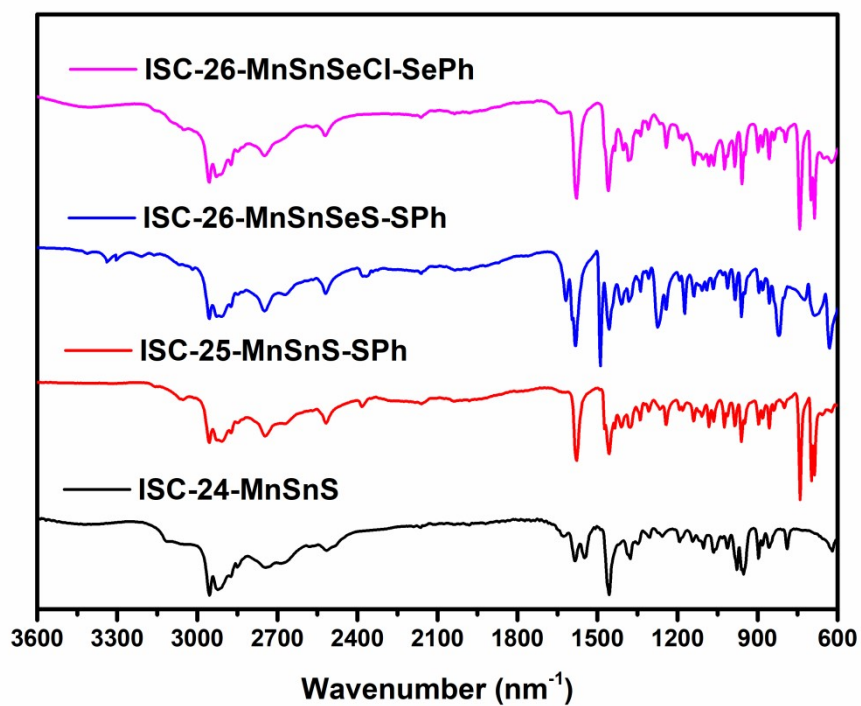

Fig. S13. FT-IR spectra of ISC-24, ISC-25 and ISC-26 series compounds.

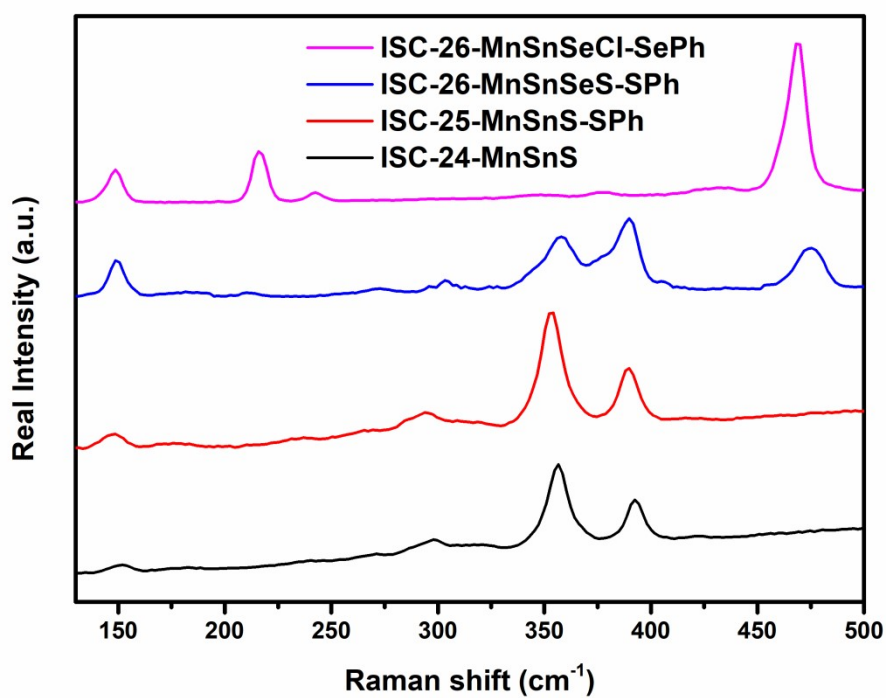

Fig. S14. Raman spectra of ISC-24, ISC-25 and ISC-26 series compounds.

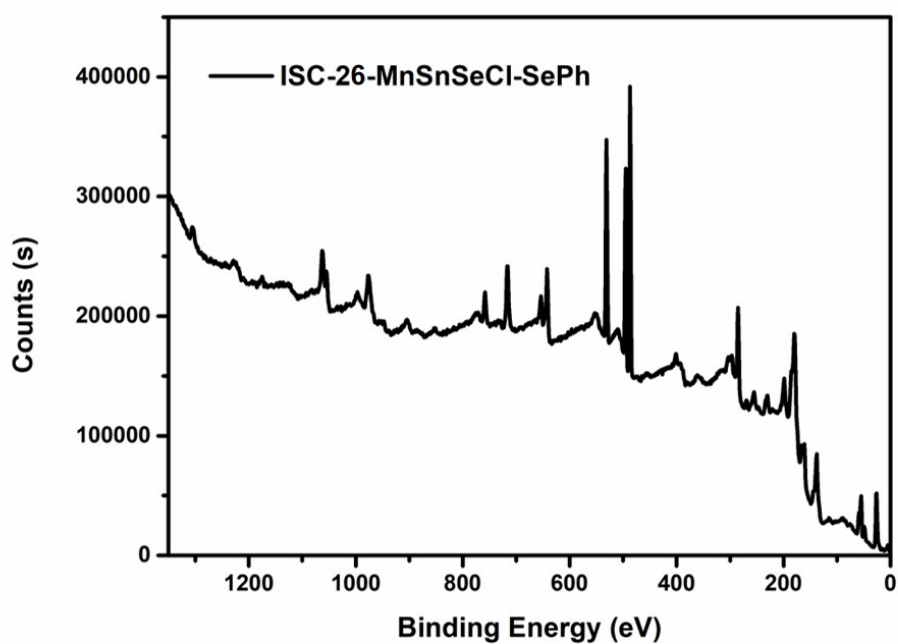

Fig. S15. XPS spectra of ISC-26-MnSnSeCl-SePh.

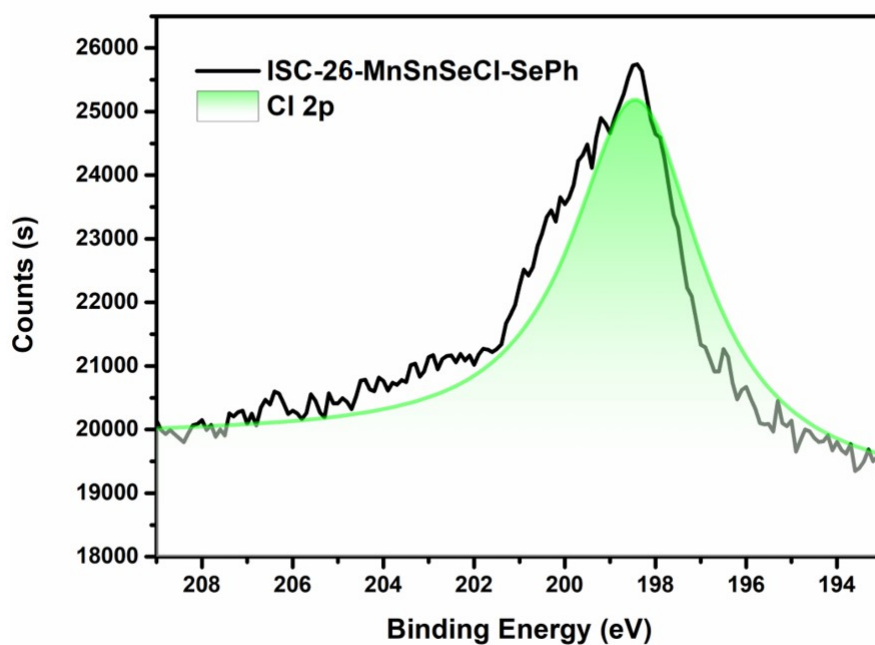

Fig. S16. High-resolution XPS spectra of Cl 2p in ISC-26-MnSnSeCl-SePh.

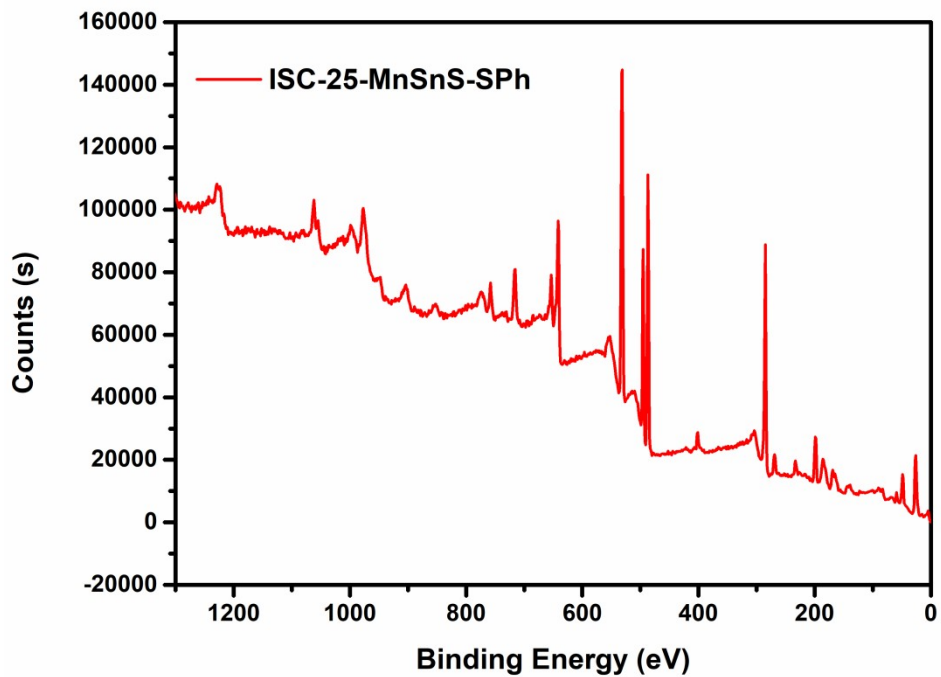

Fig. S17. XPS spectra of ISC-25-MnSnS-SPh.

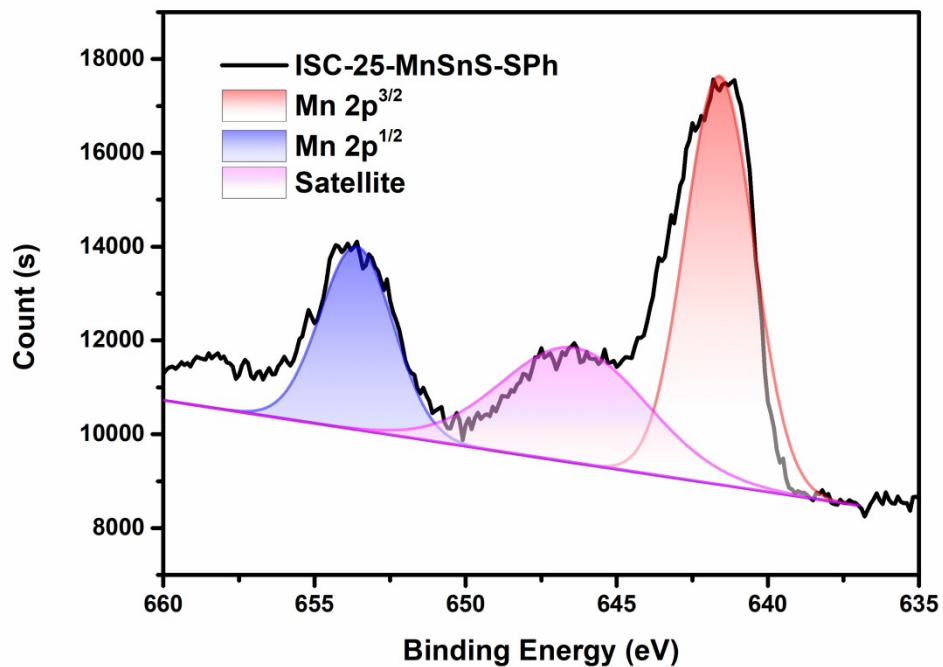

Fig. S18. High-resolution XPS spectra of Mn 2p in ISC-25-MnSnS-SPh.

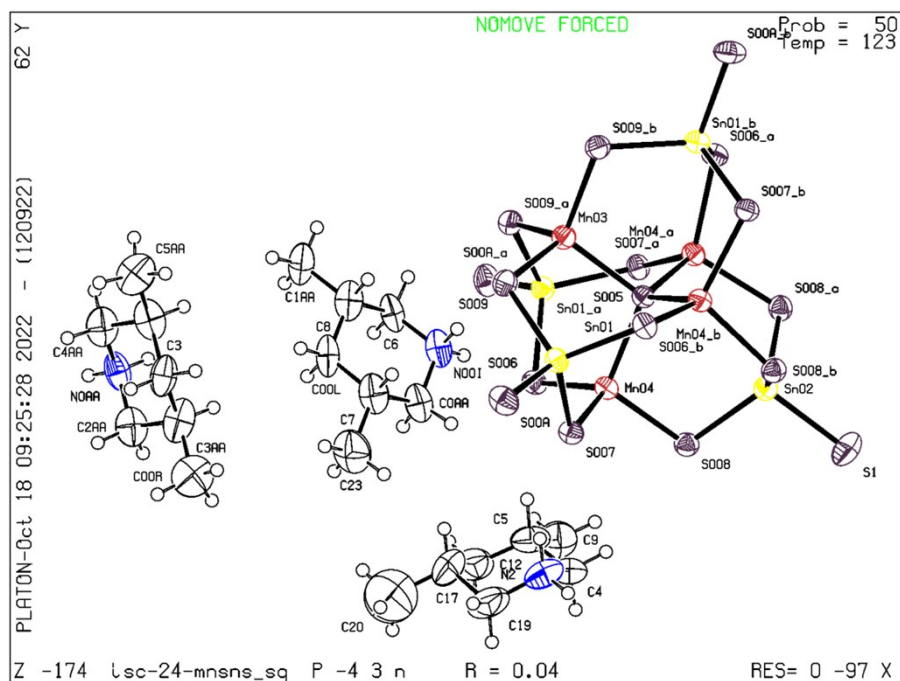

Fig. S19. Ellipsoid plot of ISC-24-MnSnS.

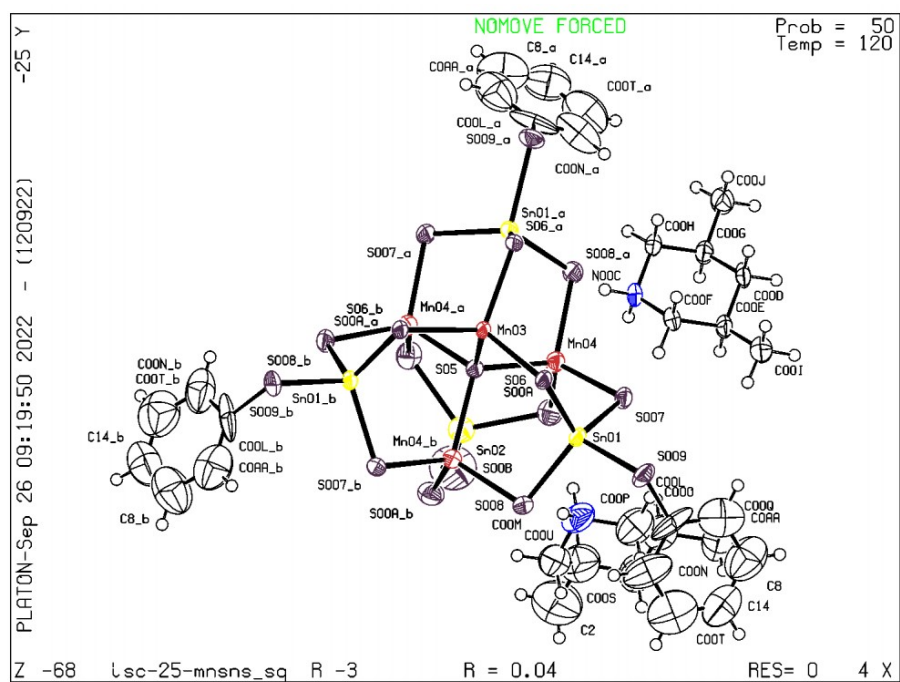

Fig. S20. Ellipsoid plot of ISC-25-MnSnS-SPh.

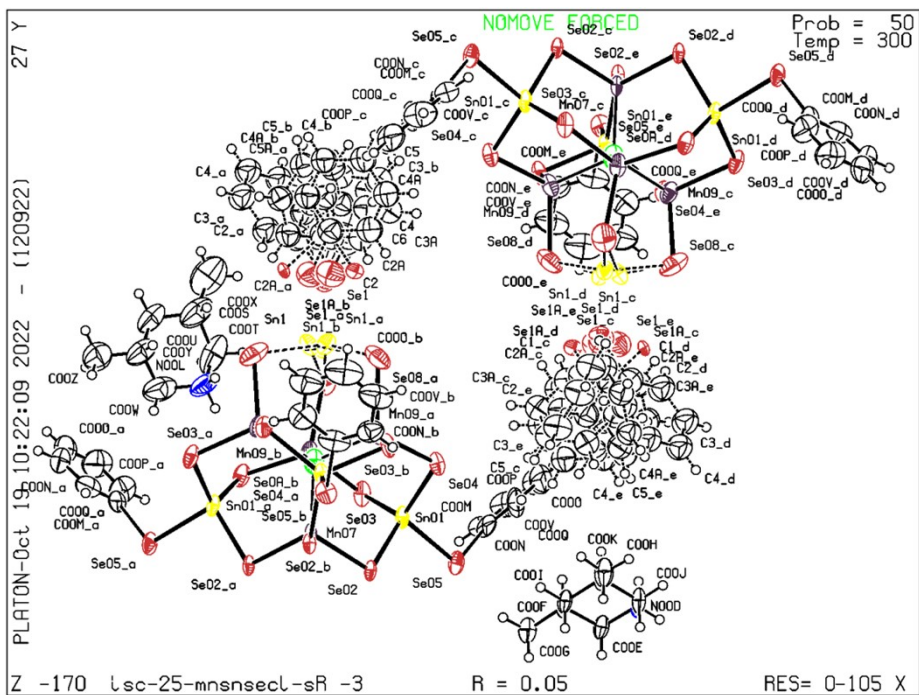

Fig. S21. Ellipsoid plot of ISC-26-MnSnSeCl-SePh.

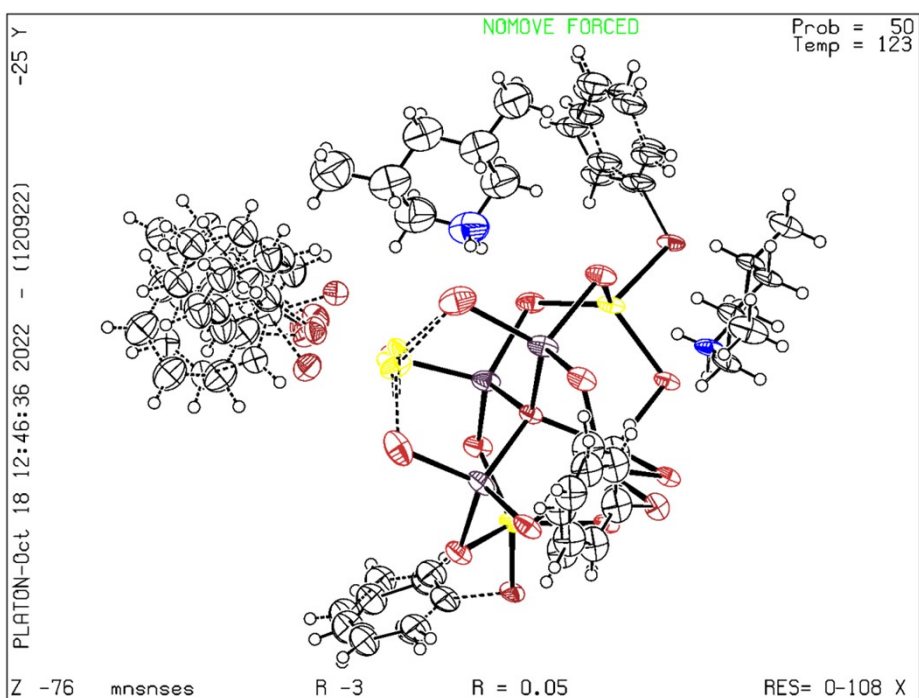

Fig. S22. Ellipsoid plot of ISC-26-MnSnSeS-SPh.

## References

1. Wu, T.; Bu, X.; Liao, P.; Wang, L.; Zheng, S. T.; Ma, R. & Feng, P., Superbase Route to Supertetrahedral Chalcogenide Clusters. *J. Am. Chem. Soc.* **2012**, *134*, 3619-3622.
2. Wang, Y.; Zhu, Z.; Sun, Z.; Hu, Q.; Li, J.; Jiang, J. & Huang, X., Discrete Supertetrahedral T5 Selenide Clusters and Their Se/S Solid Solutions: Ionic-Liquid-Assisted Precursor Route Syntheses and Photocatalytic Properties. *Chem. Eur. J.* **2020**, *26*, 1624-1632.
3. Shen, N.-N.; Hu, B.; Cheng, C.-C.; Zou, G.-D.; Hu, Q.-Q.; Du, C.-F.; Li, J.-R. & Huang, X.-Y., Discrete Supertetrahedral T3 InQ Clusters (Q = S, S/Se, Se, Se/Te): Ionothermal Syntheses and Tunable Optical and Photodegradation Properties. *Cryst. Growth & Des.* **2018**, *18*, 962-968.
4. Peters, B.; Santner, S.; Donsbach, C.; Vopel, P.; Smarsly, B. & Dehnen, S., Ionic liquid cations as methylation agent for extremely weak chalcogenido metalate nucleophiles. *Chem. Sci.* **2019**, *10*, 5211-5217.
5. Peters, B.; Stuhmann, G.; Mack, F.; Weigend, F. & Dehnen, S., Highly Soluble Supertetrahedra upon Selective Partial Butylation of Chalcogenido Metalate Clusters in Ionic Liquids. *Angew. Chem. Int. Ed.* **2021**, *60*, 17622-17628.
